# Supplementary material
Source: PubMed Central journal article supplement (PMC3557018)
Supplement: 1215416110_sd01.pdf [file 1215416110_sd01.pdf]

| Rank | Est. Free Energy of Binding | Est. Inhibition Constant, Ki | vdW + Hbond + desolv Energy | Electrostatic Energy | Total Intermol. Energy | Frequency | Interact. Surface |
|------|-----------------------------|------------------------------|-----------------------------|----------------------|------------------------|-----------|-------------------|
| 1.   | -4.98 kcal/ mol             | 223.41 uM                    | -4.79 kcal/ mol             | -0.01 kcal/ mol      | -4.80 kcal/ mol        | 23%       | 438.797           |
| 2.   | -3.70 kcal/ mol             | 1.93 mM                      | -3.79 kcal/ mol             | -0.15 kcal/ mol      | -3.94 kcal/ mol        | 6%        | 414.442           |
| 3.   | -3.67 kcal/ mol             | 2.04 mM                      | -3.47 kcal/ mol             | -0.01 kcal/ mol      | -3.48 kcal/ mol        | 18%       | 383.13            |
| 4.   | -3.47 kcal/ mol             | 2.85 mM                      | -3.78 kcal/ mol             | -0.10 kcal/ mol      | -3.88 kcal/ mol        | 9%        | 375.666           |
| 5.   | -3.46 kcal/ mol             | 2.89 mM                      | -3.91 kcal/ mol             | -0.08 kcal/ mol      | -3.98 kcal/ mol        | 2%        | 391.465           |
| 6.   | -3.42 kcal/ mol             | 3.11 mM                      | -3.37 kcal/ mol             | +0.01 kcal/ mol      | -3.36 kcal/ mol        | 3%        | 366.656           |
| 7.   | -3.32 kcal/ mol             | 3.67 mM                      | -3.39 kcal/ mol             | -0.49 kcal/ mol      | -3.89 kcal/ mol        | 9%        | 366.918           |
| 8.   | -3.30 kcal/ mol             | 3.83 mM                      | -3.47 kcal/ mol             | -0.16 kcal/ mol      | -3.63 kcal/ mol        | 5%        | 374.662           |
| 9.   | -3.17 kcal/ mol             | 4.72 mM                      | -2.90 kcal/ mol             | -0.08 kcal/ mol      | -2.98 kcal/ mol        | 1%        | 398.401           |
| 10.  | -3.16 kcal/ mol             | 4.82 mM                      | -2.65 kcal/ mol             | -0.32 kcal/ mol      | -2.97 kcal/ mol        | 2%        | 329.486           |
| 11.  | -3.04 kcal/ mol             | 5.87 mM                      | -3.95 kcal/ mol             | -0.03 kcal/ mol      | -3.98 kcal/ mol        | 5%        | 380.48            |
| 12.  | -2.98 kcal/ mol             | 6.51 mM                      | -2.90 kcal/ mol             | -0.11 kcal/ mol      | -3.02 kcal/ mol        | 1%        | 378.244           |
| 13.  | -2.96 kcal/ mol             | 6.78 mM                      | -3.08 kcal/ mol             | -0.10 kcal/ mol      | -3.17 kcal/ mol        | 1%        | 357.489           |
| 14.  | -2.87 kcal/ mol             | 7.86 mM                      | -2.97 kcal/ mol             | -0.41 kcal/ mol      | -3.38 kcal/ mol        | 1%        | 381.492           |
| 15.  | -2.86 kcal/ mol             | 8.03 mM                      | -2.71 kcal/ mol             | -0.05 kcal/ mol      | -2.75 kcal/ mol        | 1%        | 345.838           |
| 16.  | -2.83 kcal/ mol             | 8.40 mM                      | -2.81 kcal/ mol             | -0.51 kcal/ mol      | -3.31 kcal/ mol        | 5%        | 383.057           |
| 17.  | -2.59 kcal/ mol             | 12.56 mM                     | -1.91 kcal/ mol             | -0.56 kcal/ mol      | -2.47 kcal/ mol        | 3%        | 318.092           |
| 18.  | -2.58 kcal/ mol             | 12.76 mM                     | -3.00 kcal/ mol             | -0.26 kcal/ mol      | -3.26 kcal/ mol        | 1%        | 399.508           |
| 19.  | -2.39 kcal/ mol             | 17.72 mM                     | -2.29 kcal/ mol             | -0.54 kcal/ mol      | -2.83 kcal/ mol        | 1%        | 383.24            |
| 20.  | -2.24 kcal/ mol             | 22.72 mM                     | -2.85 kcal/ mol             | +0.12 kcal/ mol      | -2.73 kcal/ mol        | 1%        | 328.289           |
| 21.  | -2.24 kcal/ mol             | 22.92 mM                     | -2.66 kcal/ mol             | +0.01 kcal/ mol      | -2.66 kcal/ mol        | 1%        | 331.706           |
| 22.  | -2.18 kcal/ mol             | 25.35 mM                     | -2.71 kcal/ mol             | -0.26 kcal/ mol      | -2.96 kcal/ mol        | 1%        | 369.988           |

## Docking Parameters

### Protein Clean

```

tstep 0.2
qstep 5.0
dstep 5.0
rmstol 2.0
ga_pop_size 150
ga_num_evals 2500000
ga_num_generations 540000
ga_run 100

```

## Interaction Table

| hydrogen bonds | polar                                    | hydrophobic                                       | pi-pi | cation-pi                                                           | other                                                  |
|----------------|------------------------------------------|---------------------------------------------------|-------|---------------------------------------------------------------------|--------------------------------------------------------|
| none           | O2 - ARG27<br>( )<br>(CB)<br>[3.38]      | C5 - ILE24<br>( )<br>(CG2)<br>[3.52]              | none  | H14 - TYR33<br>( )<br>(CE1)<br>[3.68]                               | O3 - ILE24<br>( )<br>(CB, CG2)<br>[3.40]               |
|                | H14 - ARG27<br>( )<br>(CB, CD)<br>[3.69] | C6 - ILE24<br>( )<br>(CG2)<br>[3.43]              |       | H1 - TRP51<br>( )<br>(CD2, CE2,<br>CE3, CH2,<br>CZ2, CZ3)<br>[2.34] | H15 - ILE24<br>( )<br>(CB, CG2)<br>[3.35]              |
|                |                                          | C5 - TYR33<br>( )<br>(CD1, CE1)<br>[3.70]         |       |                                                                     | O4 - ILE24<br>( )<br>(CG2)<br>[3.78]                   |
|                |                                          | C8 - TRP51<br>( )<br>(CD2, CE3,<br>CZ3)<br>[3.48] |       |                                                                     | O2 - TYR33<br>( )<br>(CE1)<br>[3.30]                   |
|                |                                          | C1 - TRP51<br>( )<br>(CH2)<br>[3.61]              |       |                                                                     | N1 - TRP51<br>( )<br>(CE3, CH2,<br>CZ2, CZ3)<br>[3.30] |
|                |                                          | C1 - VAL56<br>( )<br>(CB)<br>[3.66]               |       |                                                                     | O5 - THR55<br>( )<br>(CG2)<br>[3.71]                   |
|                |                                          |                                                   |       |                                                                     | O4 - PRO58<br>( )<br>(CD, CG)<br>[3.50]                |
|                |                                          |                                                   |       |                                                                     | H15 - PRO58<br>( )<br>(CD, CG)<br>[3.50]               |

## Interactions

24: ILE  
27: ARG  
33: TYR  
51: TRP  
55: THR  
56: VAL  
58: PRO

## Computational Methods

Docking calculations were carried out using DockingServer (<http://www.dockingserver.com>). Gasteiger partial charges were added to the ligand atoms. Non-polar hydrogen atoms were merged, and rotatable bonds were defined. Docking calculations were carried out on *NAG.pdb* protein model. Essential hydrogen atoms, Kollman united atom type charges, and solvation parameters were added with the aid of AutoDock tools (Morris, Goodsell et al., 1998). Affinity (grid) maps of  $\times \times \text{Å}$  grid points and 0.375 Å spacing were generated using the Autogrid program (Morris, Goodsell et al., 1998). AutoDock parameter set- and distance-dependent dielectric functions were used in the calculation of the van der Waals and the electrostatic terms, respectively. Docking simulations were performed using the Lamarckian genetic algorithm (LGA) and the Solis & Wets local search method (Solis and Wets, 1981). Initial position, orientation, and torsions of the ligand molecules were set randomly. All rotatable torsions were released during docking. Each docking experiment was derived from 100 different runs that were set to terminate after a maximum of 2500000 energy evaluations. The population size was set to 150. During the search, a translational step of 0.2 Å, and quaternion and torsion steps of 5 were applied.

## References

E. Hazai, S. Kovacs, L. Demko, Z. Bikadi  
*DockingServer* ([www.dockingserver.com](http://www.dockingserver.com))  
Virtua Drug Ltd., Budapest, Hungary

T. A. Halgren  
*Merck molecular force field. I. Basis, form, scope, parametrization, and performance of MMFF94*  
*Journal of Computational Chemistry* 17 (5-6), 490-519 (1998)

G. M. Morris, D. S. Goodsell, et al.  
*Automated docking using a Lamarckian genetic algorithm and an empirical binding free energy function*  
*Journal of Computational Chemistry* 19 (14), 1639-1662 (1998)

F. J. Solis and R. J. B. Wets  
*Minimization by Random Search Techniques*  
*Mathematics of Operations Research* 6 (1), 19-30 (1981)

## Image Gallery

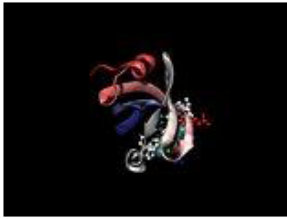

This software includes code developed by the Theoretical and Computational Biophysics Group in the Beckman Institute for Advanced Science and Technology at the University of Illinois at Urbana- Champaign.

### References, please cite:

W. Humphrey, A. Dalke, and K. Schulten  
*VMD - Visual Molecular Dynamics*  
J. Mol. Graph. **14**, 33-38 (1996)

N-acetylglucosamine docking parameters to VisP *S. Typhimurium* modeled structure.

| Results Table |                             |                              |                             |                      |                        |           |                   |
|---------------|-----------------------------|------------------------------|-----------------------------|----------------------|------------------------|-----------|-------------------|
| Rank          | Est. Free Energy of Binding | Est. Inhibition Constant, Ki | vdW + Hbond + desolv Energy | Electrostatic Energy | Total Intermol. Energy | Frequency | Interact. Surface |
| 1.            | -2.69 kcal/ mol             | 10.64 mM                     | -4.85 kcal/ mol             | -0.08 kcal/ mol      | -4.93 kcal/ mol        | 11%       | 426.921           |
| 2.            | -2.67 kcal/ mol             | 10.99 mM                     | -3.80 kcal/ mol             | -0.12 kcal/ mol      | -3.93 kcal/ mol        | 18%       | 373.792           |
| 3.            | -2.47 kcal/ mol             | 15.52 mM                     | -3.00 kcal/ mol             | -0.11 kcal/ mol      | -3.11 kcal/ mol        | 17%       | 411.997           |
| 4.            | -2.35 kcal/ mol             | 18.79 mM                     | -4.12 kcal/ mol             | +0.05 kcal/ mol      | -4.06 kcal/ mol        | 7%        | 423.29            |
| 5.            | -2.29 kcal/ mol             | 21.00 mM                     | -4.58 kcal/ mol             | -0.07 kcal/ mol      | -4.65 kcal/ mol        | 10%       | 469.379           |
| 6.            | -2.06 kcal/ mol             | 30.75 mM                     | -3.20 kcal/ mol             | -0.08 kcal/ mol      | -3.28 kcal/ mol        | 3%        | 412.409           |
| 7.            | -1.75 kcal/ mol             | 52.12 mM                     | -2.90 kcal/ mol             | -0.87 kcal/ mol      | -3.77 kcal/ mol        | 2%        | 435.958           |
| 8.            | -1.66 kcal/ mol             | 60.41 mM                     | -3.12 kcal/ mol             | -0.93 kcal/ mol      | -4.05 kcal/ mol        | 4%        | 406.202           |
| 9.            | -1.52 kcal/ mol             | 77.51 mM                     | -4.65 kcal/ mol             | -0.14 kcal/ mol      | -4.79 kcal/ mol        | 1%        | 437.015           |
| 10.           | -0.93 kcal/ mol             | 208.35 mM                    | -2.37 kcal/ mol             | +0.23 kcal/ mol      | -2.14 kcal/ mol        | 3%        | 354.806           |
| 11.           | -0.80 kcal/ mol             | 258.57 mM                    | -3.10 kcal/ mol             | -0.10 kcal/ mol      | -3.20 kcal/ mol        | 2%        | 417.624           |
| 12.           | -0.18 kcal/ mol             | 738.44 mM                    | -2.43 kcal/ mol             | -0.32 kcal/ mol      | -2.75 kcal/ mol        | 1%        | 417.777           |
| 13.           | -0.13 kcal/ mol             | 798.73 mM                    | -2.56 kcal/ mol             | +0.14 kcal/ mol      | -2.42 kcal/ mol        | 1%        | 359.325           |
| 14.           | -0.12 kcal/ mol             | 821.77 mM                    | -3.35 kcal/ mol             | -0.28 kcal/ mol      | -3.63 kcal/ mol        | 1%        | 413.4             |
| 15.           | +0.17 kcal/ mol             |                              | -1.89 kcal/ mol             | -0.06 kcal/ mol      | -1.95 kcal/ mol        | 1%        | 386.46            |
| 16.           | +0.65 kcal/ mol             |                              | -1.39 kcal/ mol             | -0.29 kcal/ mol      | -1.68 kcal/ mol        | 1%        | 442.364           |
| 17.           | +1.54 kcal/ mol             |                              | -1.76 kcal/ mol             | -0.89 kcal/ mol      | -2.65 kcal/ mol        | 1%        | 362.723           |
| 18.           | +1.71 kcal/ mol             |                              | -2.08 kcal/ mol             | -0.05 kcal/ mol      | -2.13 kcal/ mol        | 4%        | 464.03            |
| 19.           | +2.14 kcal/ mol             |                              | -0.53 kcal/ mol             | -0.11 kcal/ mol      | -0.64 kcal/ mol        | 3%        | 460.711           |
| 20.           | +2.39 kcal/ mol             |                              | +0.18 kcal/ mol             | +0.05 kcal/ mol      | +0.23 kcal/ mol        | 3%        | 483.123           |
| 21.           | +3.91 kcal/ mol             |                              | -0.89 kcal/ mol             | -0.37 kcal/ mol      | -1.26 kcal/ mol        | 2%        | 419.047           |
| 22.           | +4.18 kcal/ mol             |                              | -0.49 kcal/ mol             | -0.32 kcal/ mol      | -0.81 kcal/ mol        | 1%        | 351.61            |
| 23.           | +5.50 kcal/ mol             |                              | +0.76 kcal/ mol             | +0.01 kcal/ mol      | +0.77 kcal/ mol        | 3%        | 469.707           |

## Docking Parameters

### Protein Clean

|                           |         |
|---------------------------|---------|
| <i>tstep</i>              | 0.2     |
| <i>qstep</i>              | 5.0     |
| <i>dstep</i>              | 5.0     |
| <i>rmstol</i>             | 2.0     |
| <i>ga_pop_size</i>        | 150     |
| <i>ga_num_evals</i>       | 2500000 |
| <i>ga_num_generations</i> | 540000  |
| <i>ga_run</i>             | 100     |

### Interaction Table

| hydrogen bonds | polar                                 | hydrophobic                       | pi-pi       | cation-pi   | other                                        |
|----------------|---------------------------------------|-----------------------------------|-------------|-------------|----------------------------------------------|
| <i>none</i>    | O - ASN43<br>(<br>[2.71]<br>ND2, OD1) | CA - VAL75<br>(<br>[3.76]<br>CG1) | <i>none</i> | <i>none</i> | O - LYS10<br>(<br>[3.63]<br>CD, CE)          |
|                | H - ASN43<br>(<br>[2.07]<br>ND2, OD1) | C - VAL75<br>(<br>[3.28]<br>CG1)  |             |             | H - VAL34<br>(<br>[3.27]<br>CB, CG1,<br>CG2) |
|                | N - ASN43<br>(<br>[3.69]<br>ND2)      |                                   |             |             | O - VAL34<br>(<br>[3.52]<br>CG1, CG2)        |
|                |                                       |                                   |             |             | O - THR41<br>(<br>[3.22]<br>CG2)             |
|                |                                       |                                   |             |             | H - THR41<br>(<br>[3.51]<br>CG2)             |
|                |                                       |                                   |             |             | H - ASN43<br>(<br>[2.88]<br>CB, CG)          |
|                |                                       |                                   |             |             | C - ASN43<br>(<br>[3.23]<br>CG, ND2,<br>OD1) |
|                |                                       |                                   |             |             | O - ASN43<br>(<br>[3.43]<br>CG)              |
|                |                                       |                                   |             |             | C - SER74<br>(<br>[3.26]<br>CB)              |
|                |                                       |                                   |             |             | N - VAL75<br>(<br>[3.89]<br>CG1)             |
|                |                                       |                                   |             |             | ...                                          |
|                |                                       |                                   |             |             | ...                                          |

### Interactions

10: LYS  
34: VAL  
41: THR  
43: ASN  
74: SER  
75: VAL  
78: GLU

## Computational Methods

Docking calculations were carried out using DockingServer (<http://www.dockingserver.com>). Gasteiger partial charges were added to the ligand atoms. Non-polar hydrogen atoms were merged, and rotatable bonds were defined.

Docking calculations were carried out on *N*-acetylmuramic acid protein model. Essential hydrogen atoms, Kollman united atom type charges, and solvation parameters were added with the aid of AutoDock tools (Morris, Goodsell *et al.*, 1998). Affinity (grid) maps of  $\times\times$  Å grid points and 0.375 Å spacing were generated using the Autogrid program (Morris, Goodsell *et al.*, 1998). AutoDock parameter set- and distance- dependent dielectric functions were used in the calculation of the van der Waals and the electrostatic terms, respectively.

Docking simulations were performed using the Lamarckian genetic algorithm (LGA) and the Solis & Wets local search method (Solis and Wets, 1981). Initial position, orientation, and torsions of the ligand molecules were set randomly. All rotatable torsions were released during docking. Each docking experiment was derived from 100 different runs that were set to terminate after a maximum of 2500000 energy evaluations. The population size was set to 150. During the search, a translational step of 0.2 Å, and quaternion and torsion steps of 5 were applied.

## References

E. Hazai, S. Kovacs, L. Demko, Z. Bikadi  
*DockingServer* ([www.dockingserver.com](http://www.dockingserver.com))  
Virtua Drug Ltd., Budapest, Hungary

T. A. Halgren  
*Merck molecular force field. I. Basis, form, scope, parametrization, and performance of MMFF94*  
*Journal of Computational Chemistry* **17** (5-6), 490-519 (1998)

G. M. Morris, D. S. Goodsell, *et al.*  
*Automated docking using a Lamarckian genetic algorithm and an empirical binding free energy function*  
*Journal of Computational Chemistry* **19** (14), 1639-1662 (1998)

F. J. Solis and R. J. B. Wets  
*Minimization by Random Search Techniques*  
*Mathematics of Operations Research* **6** (1), 19-30 (1981)

## Image Gallery

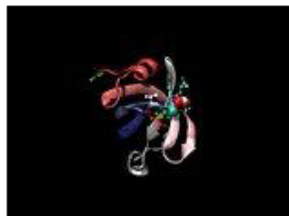

This software includes code developed by the Theoretical and Computational Biophysics Group in the Beckman Institute for Advanced Science and Technology at the University of Illinois at Urbana- Champaign.

## References, please cite:

W. Humphrey, A. Dalke, and K. Schulten  
*VMD - Visual Molecular Dynamics*  
*J. Mol. Graph.* **14**, 33-38 (1996)

N-acetylmuramic acid docking parameters to VisP *S. Typhimurium* modeled structure.
